# Supplementary material for: Discovery of Indoleamine 2,3-Dioxygenase 1 (IDO-1) Inhibitors Based on Ortho-Naphthaquinone-Containing Natural Product
Source: PubMed Central journal article supplement (PMC6471201; doi:10.3390/molecules24061059), 2019-03-18
Supplement: molecules-24-01059-s001.pdf [file molecules-24-01059-s001.pdf]

*Supplementary Material*

**Discovery of Indoleamine 2,3-Dioxygenase Inhibitors Based on Natural Product Tanshinone**

**Hongchuan Zhao**<sup>1,#</sup>, **Pu Sun**<sup>2,#</sup> **Wei Guo**<sup>2</sup> **Yi Wang**<sup>2</sup> **Ao Zhang**<sup>1,3,4</sup> **Linghua Meng**<sup>\*,2</sup>, and **Chunyong Ding**<sup>\*,1,4</sup>

<sup>1</sup> CAS Key Laboratory of Receptor Research, State Key Laboratory of Drug Research, Synthetic Organic & Medicinal Chemistry Laboratory, Shanghai Institute of *Materia Medica*, Chinese Academy of Sciences, Shanghai 201203, China

<sup>2</sup> Division of Anti-tumor Pharmacology, Shanghai Institute of *Materia Medica*, Chinese Academy of Sciences, Shanghai 201203, China

<sup>3</sup> ShanghaiTech University, Shanghai 20120, China

<sup>4</sup> University of Chinese Academy of Sciences, Beijing 100049, China.

# These authors contributed equally to this work

\* Correspondence and requests for materials should be addressed to C. D. (email: [chding@sim.ac.cn](mailto:chding@sim.ac.cn)), or L. M. ([lhmeng@sim.ac.cn](mailto:lhmeng@sim.ac.cn))

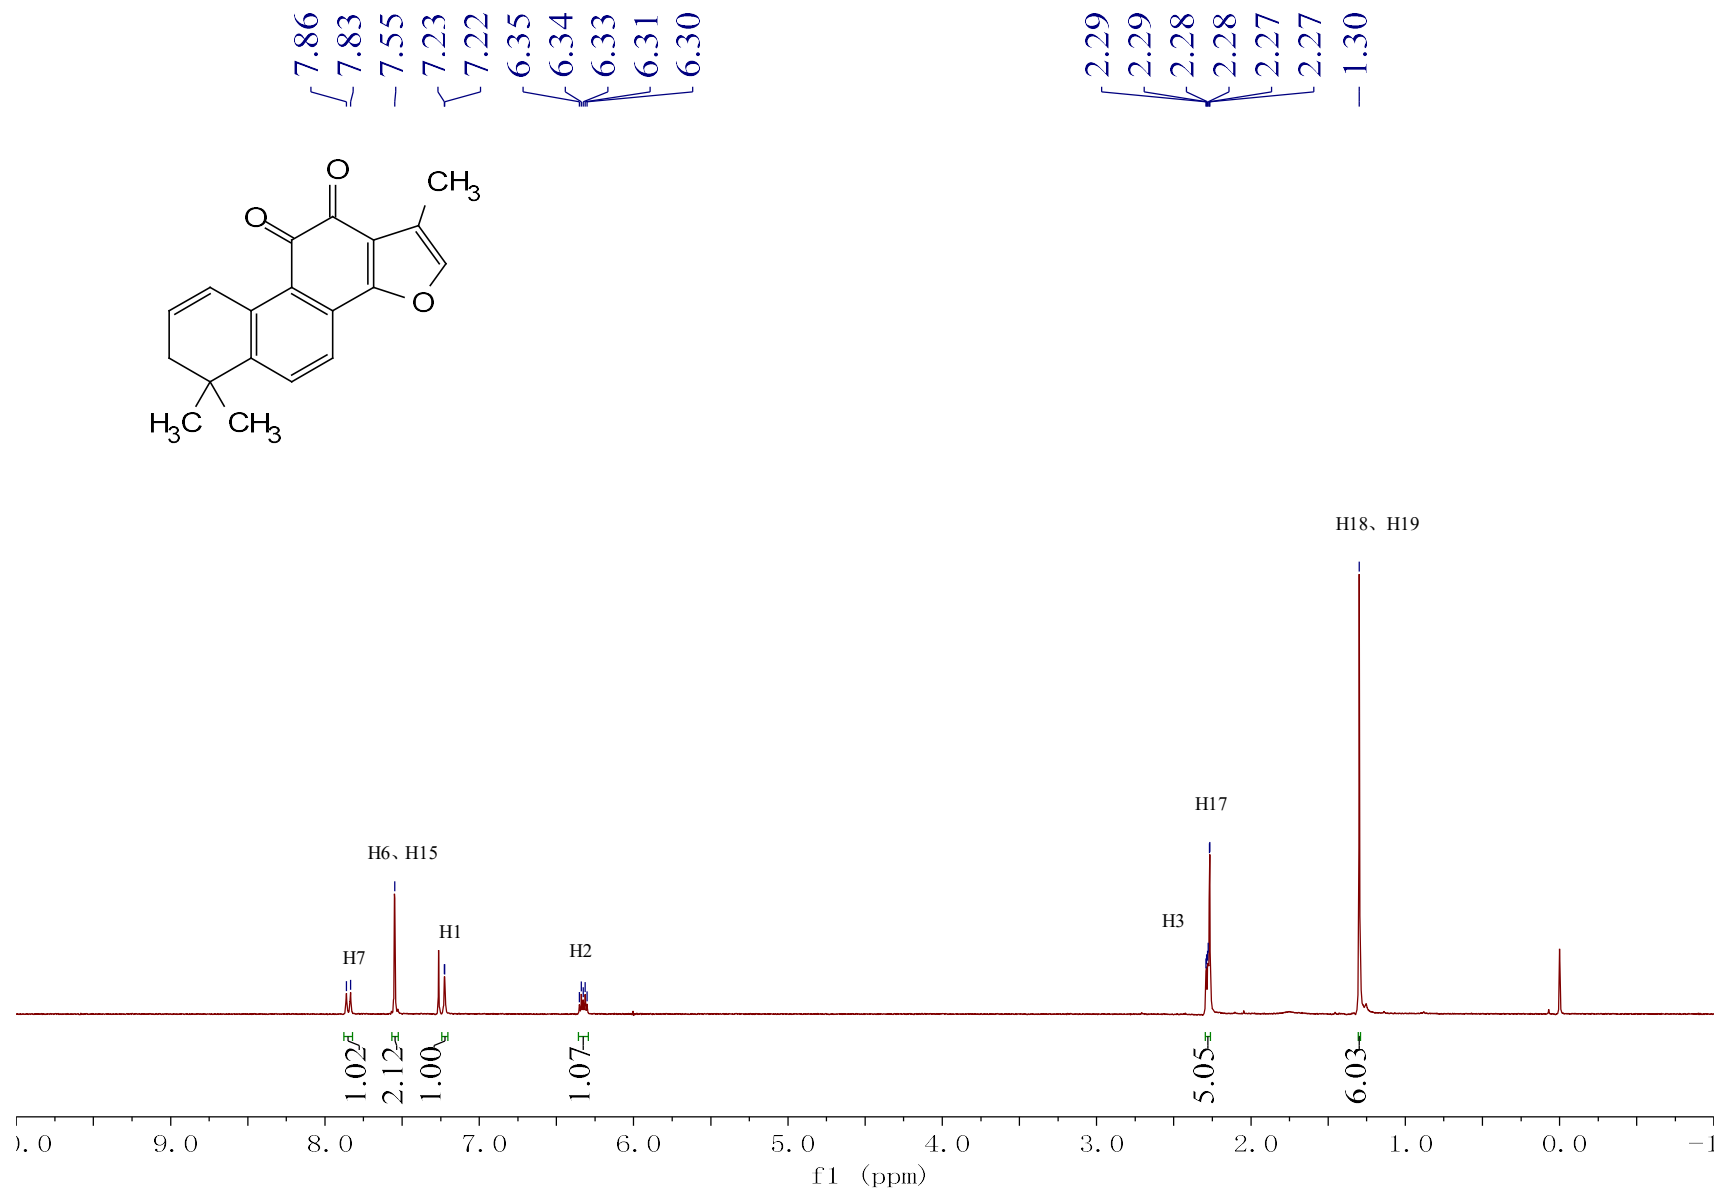

Figure S1. <sup>1</sup>H-NMR spectrum of compound 9

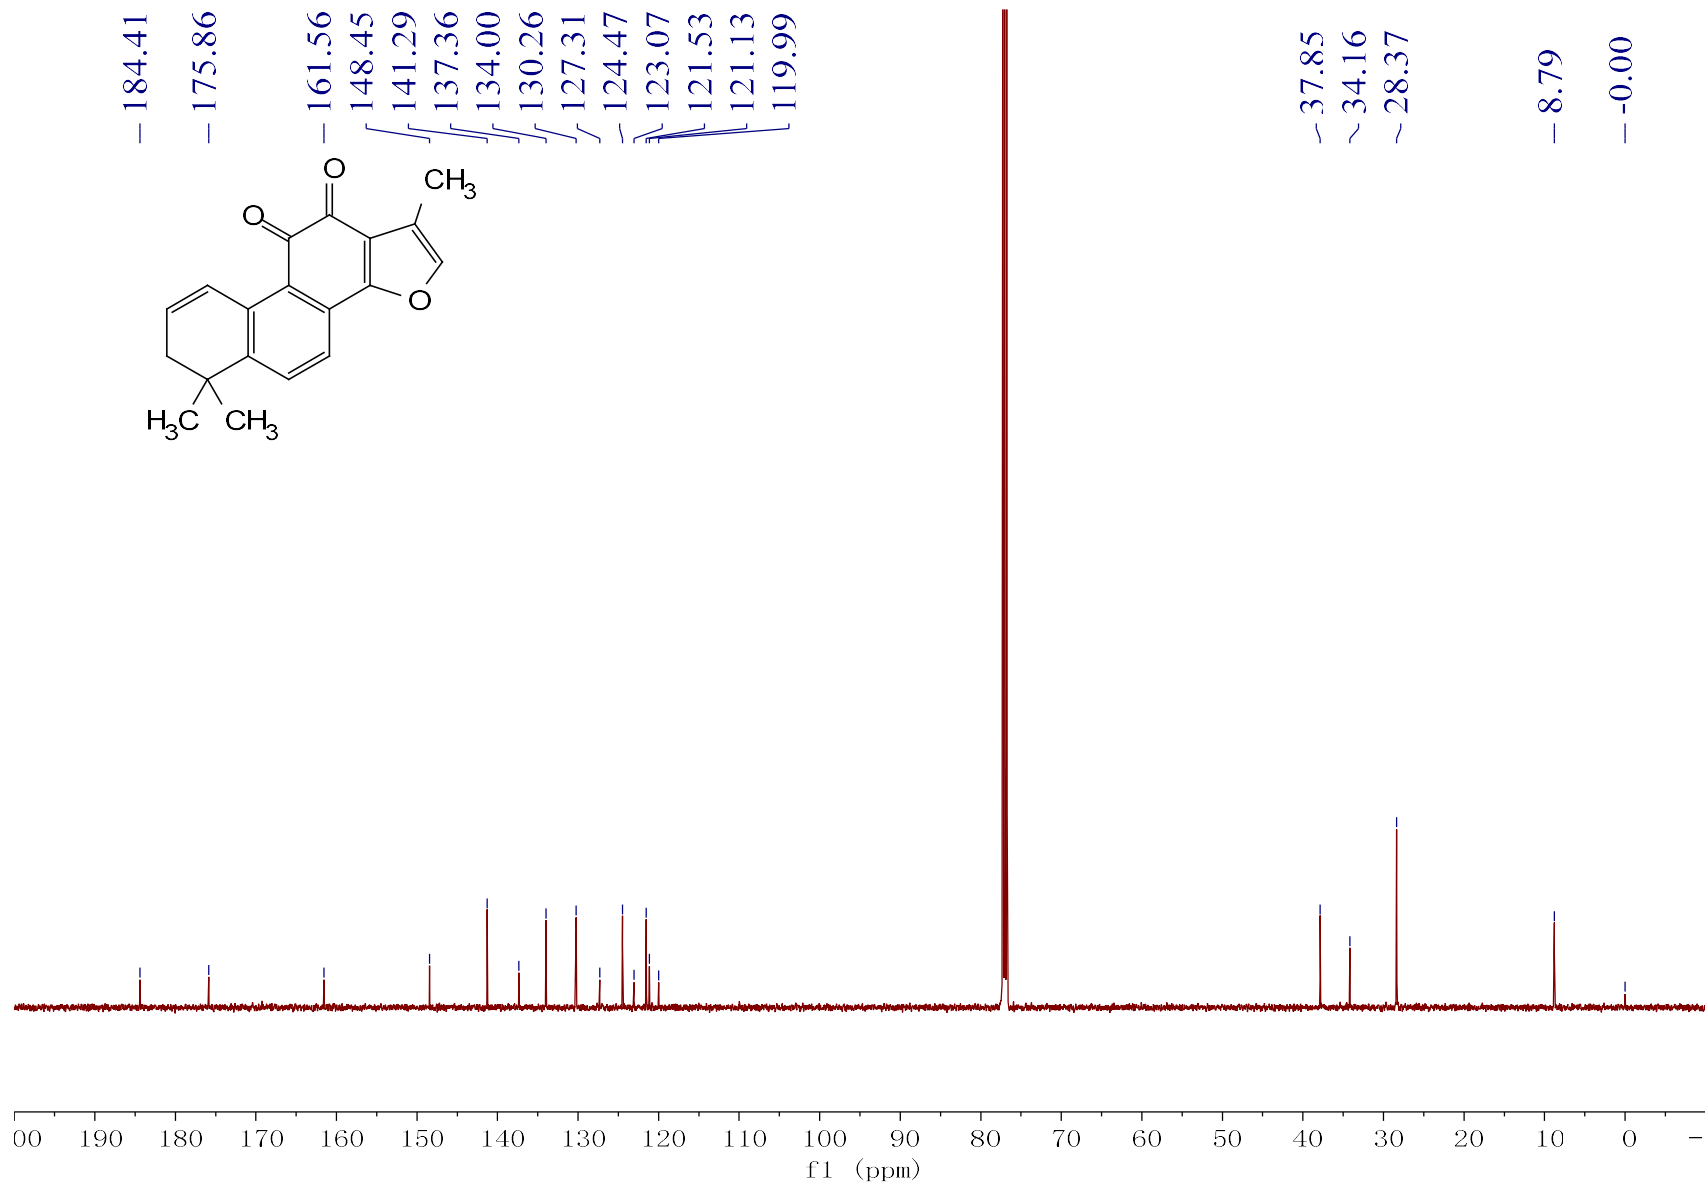

Figure S2. <sup>13</sup>C-NMR spectrum of compound 9

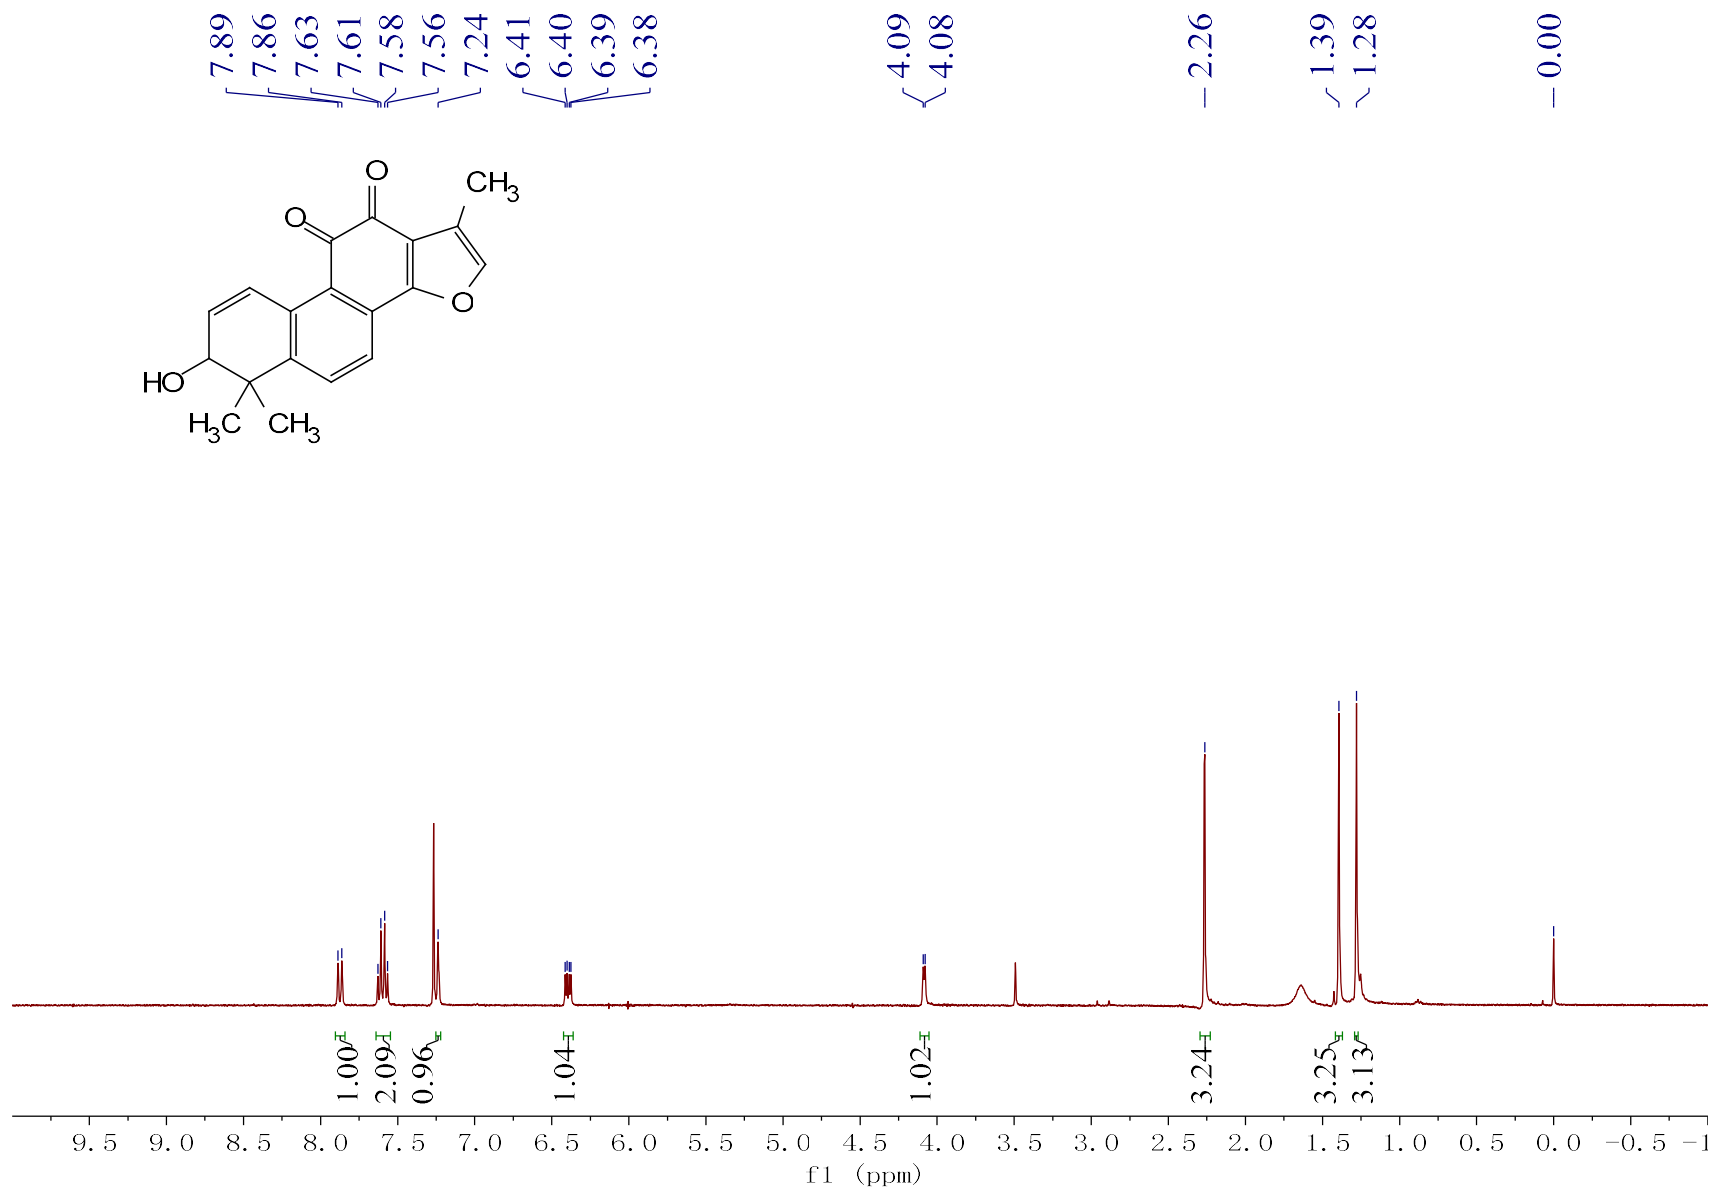

Figure S3. <sup>1</sup>H-NMR spectrum of compound 10

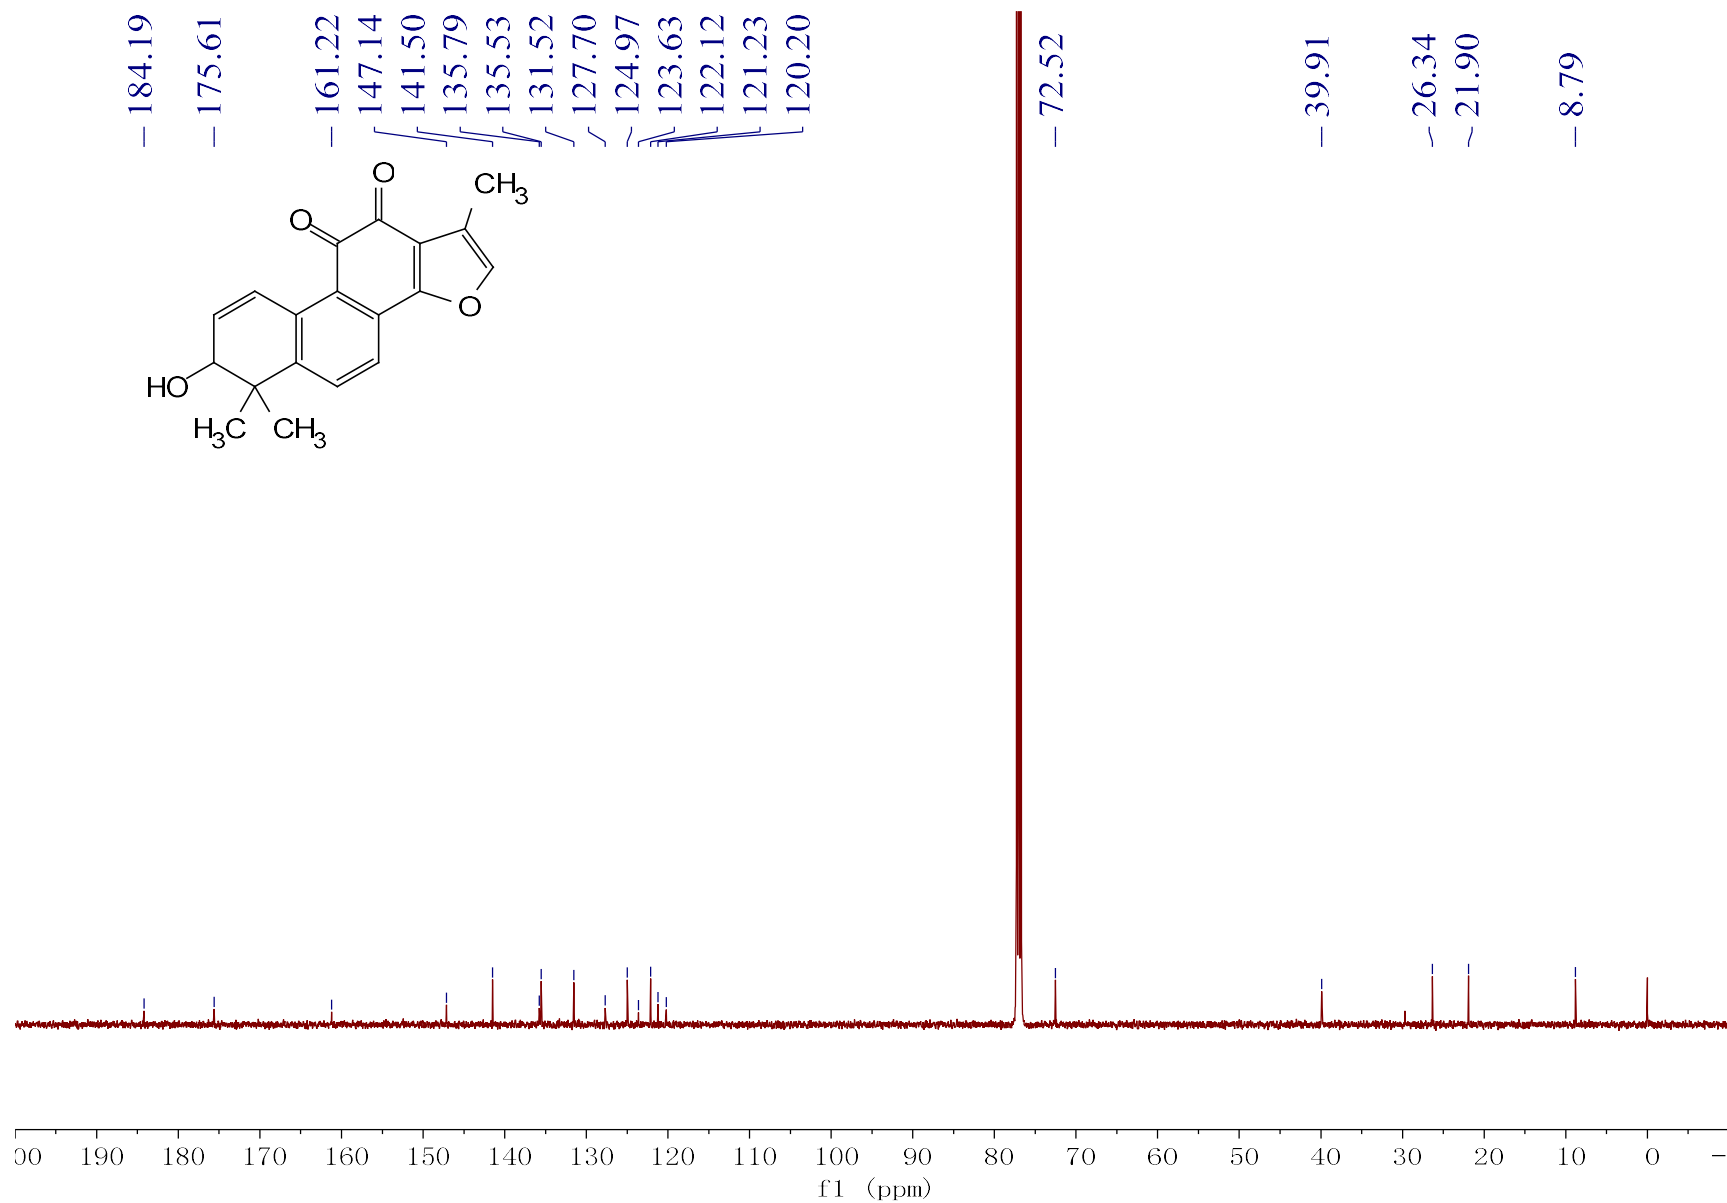

Figure S4. <sup>13</sup>C-NMR spectrum of compound 10

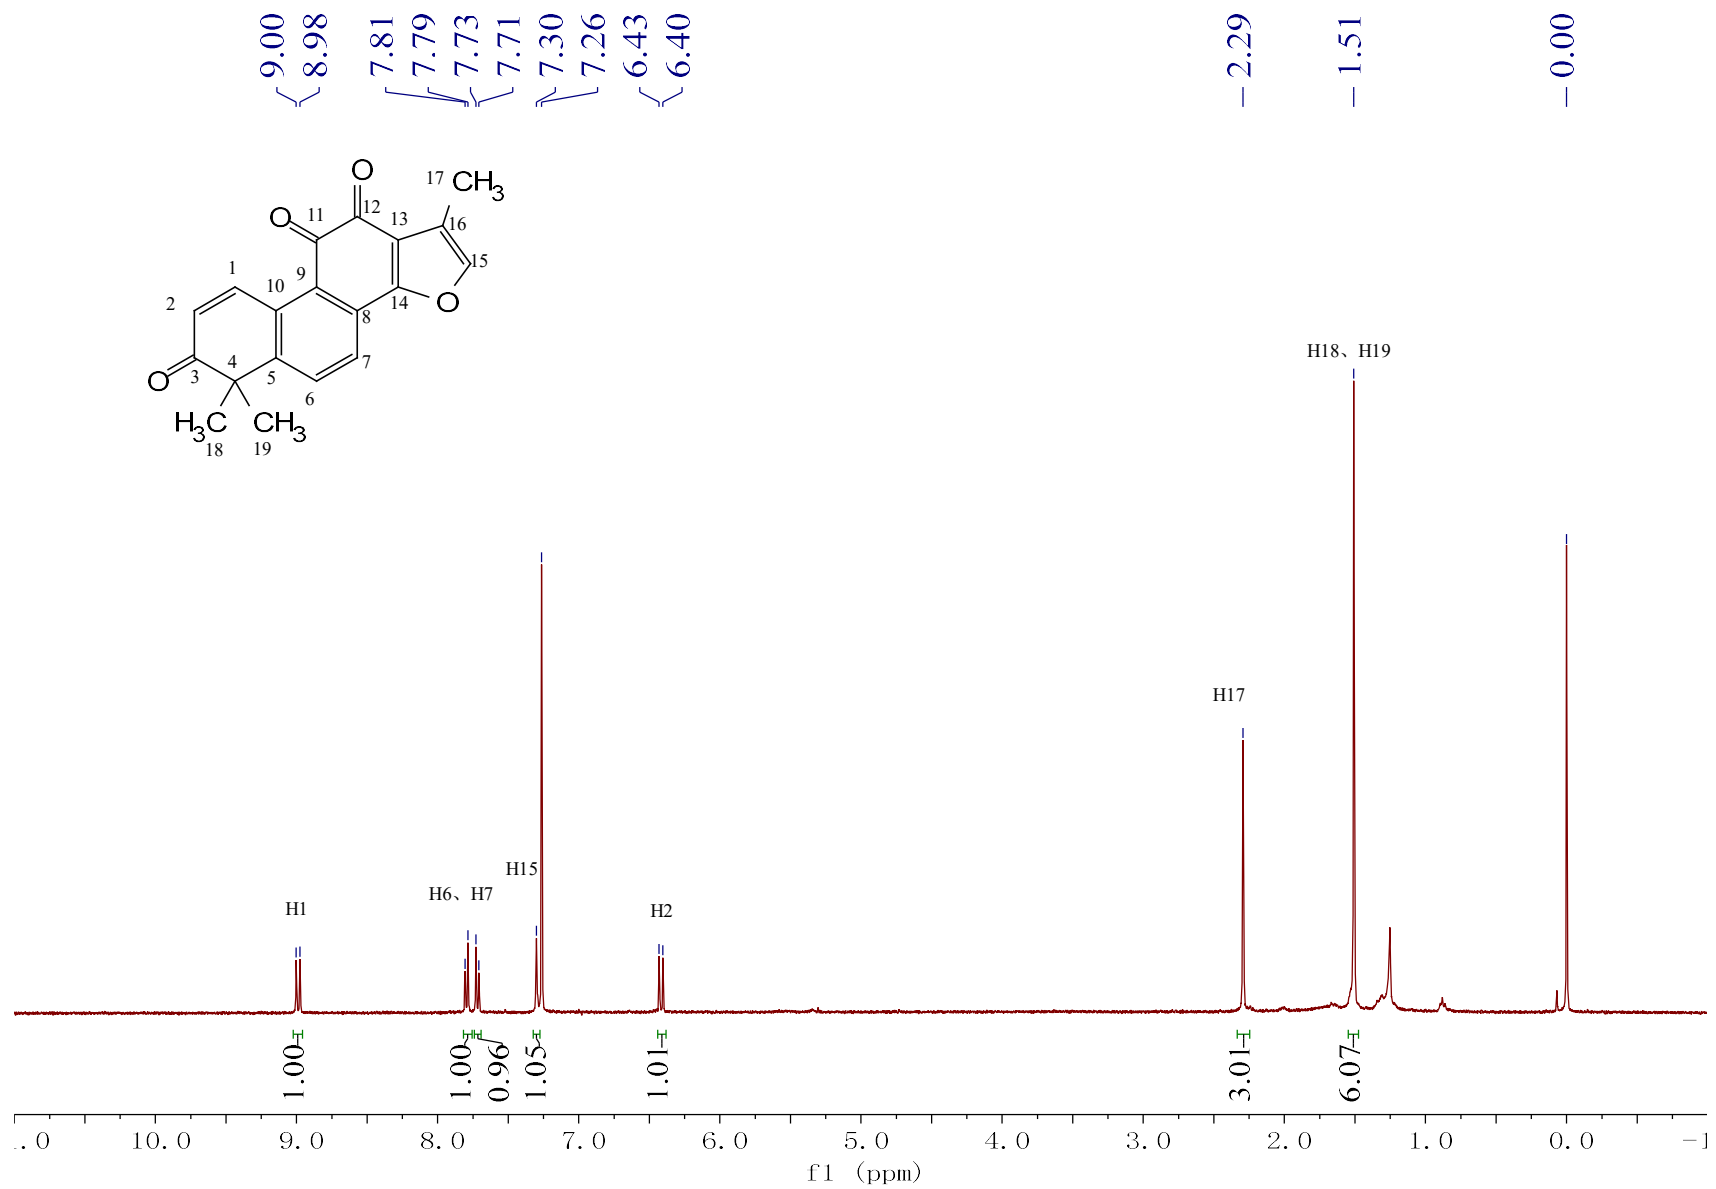

Figure S5. <sup>1</sup>H-NMR spectrum of compound 11

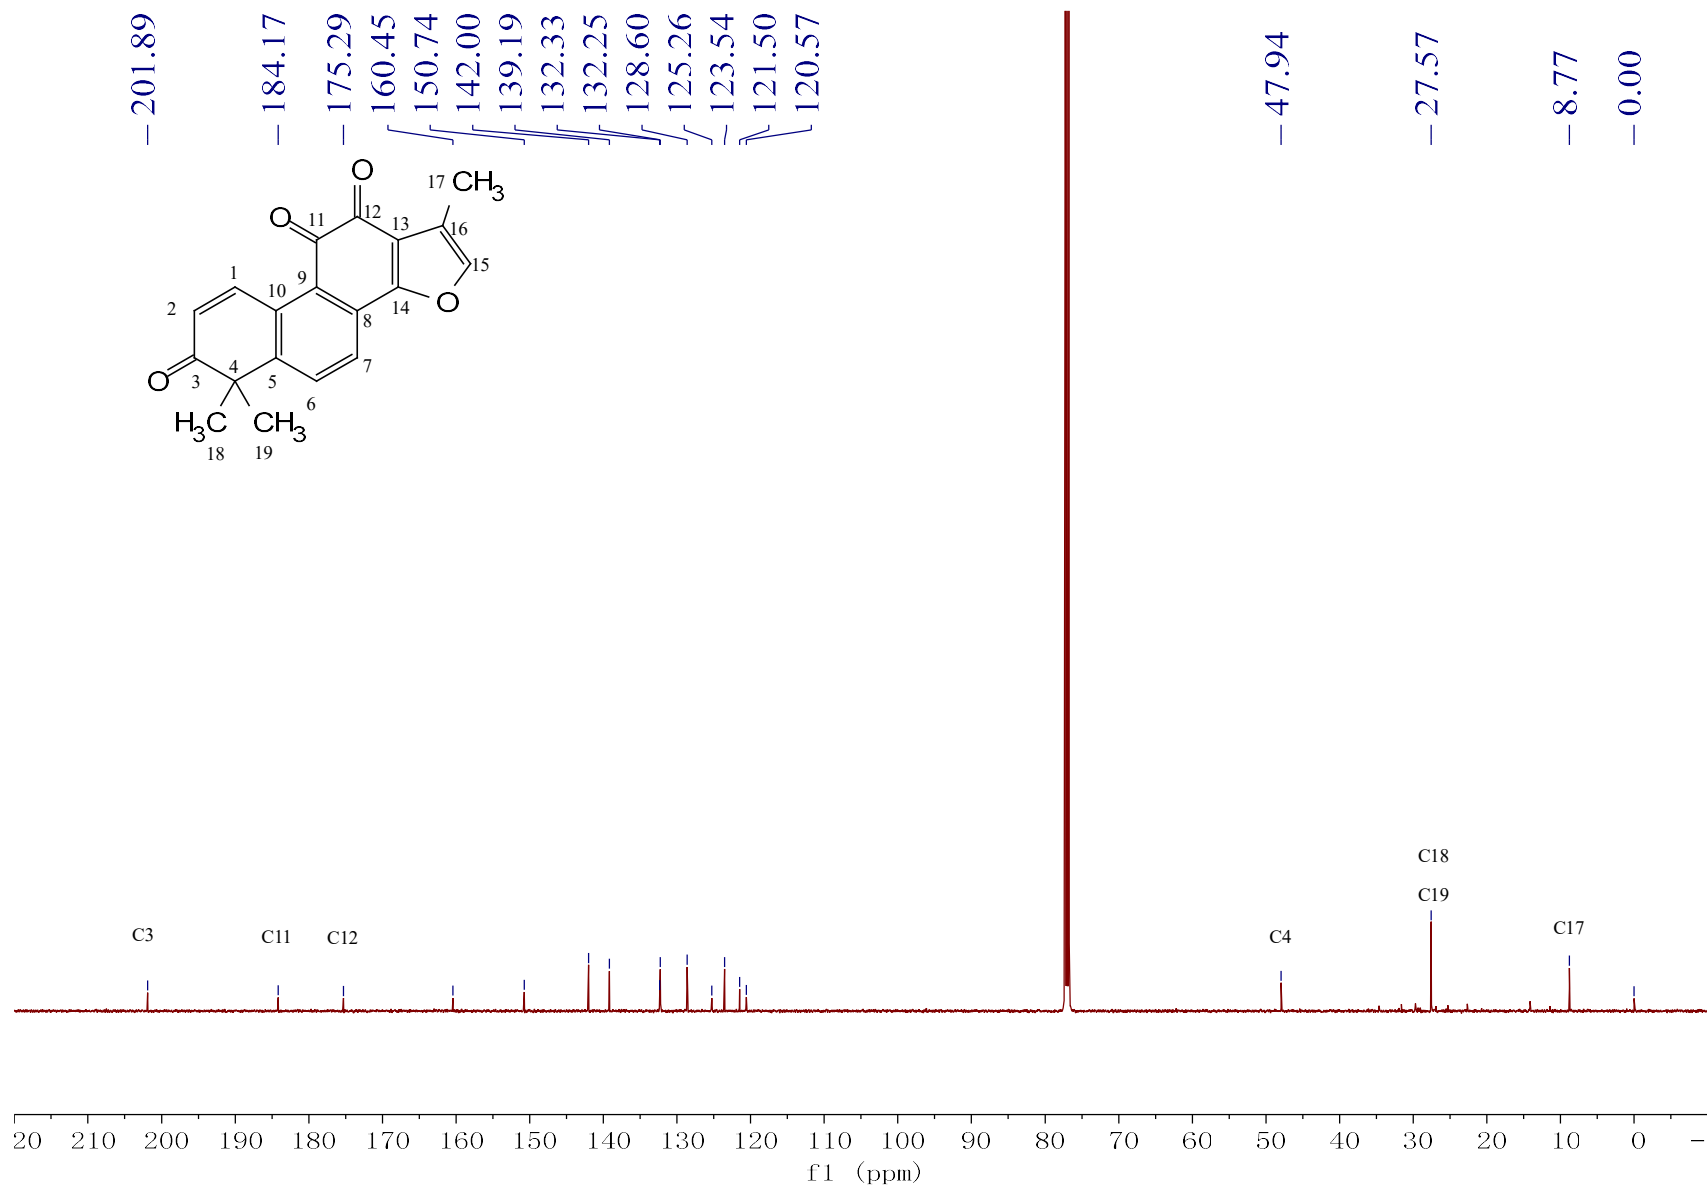

Figure S6. <sup>13</sup>C-NMR spectrum of compound 11

## Qualitative Analysis Report

|                 |                                        |                        |                             |
|-----------------|----------------------------------------|------------------------|-----------------------------|
| Data Filename   | ESIH_20181226_ZA_ZHC_04.d              | Sample Name            | D5-12598-024                |
| Sample Type     | Sample                                 | Position               | P1-A1                       |
| Instrument Name | Agilent G6520 Q-TOF                    | Acq Method             | 20160322_MS_ESIH_POS_1min.m |
| Acquired Time   | 12/26/2018 13:25:43                    | IRM Calibration Status | Success                     |
| DA Method       | small molecular data analysis method.m | Comment                | ESIH by ZZY                 |

### User Spectra

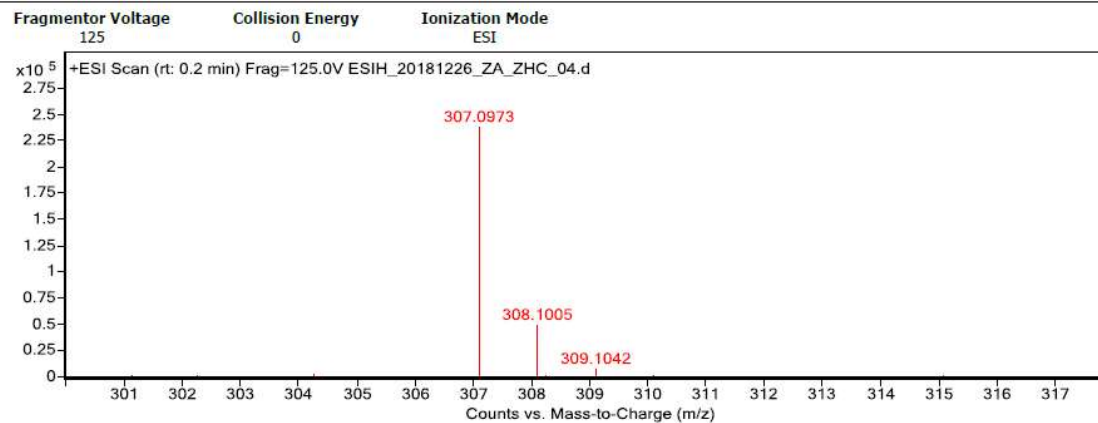

### Formula Calculator Results

| m/z      | Calc m/z | Diff (mDa) | Diff (ppm) | Ion Formula | Ion    |
|----------|----------|------------|------------|-------------|--------|
| 307.0973 | 307.0965 | -0.77      | -2.51      | C19 H15 O4  | (M+H)+ |

--- End Of Report ---

Figure S7. HRMS of compound 11



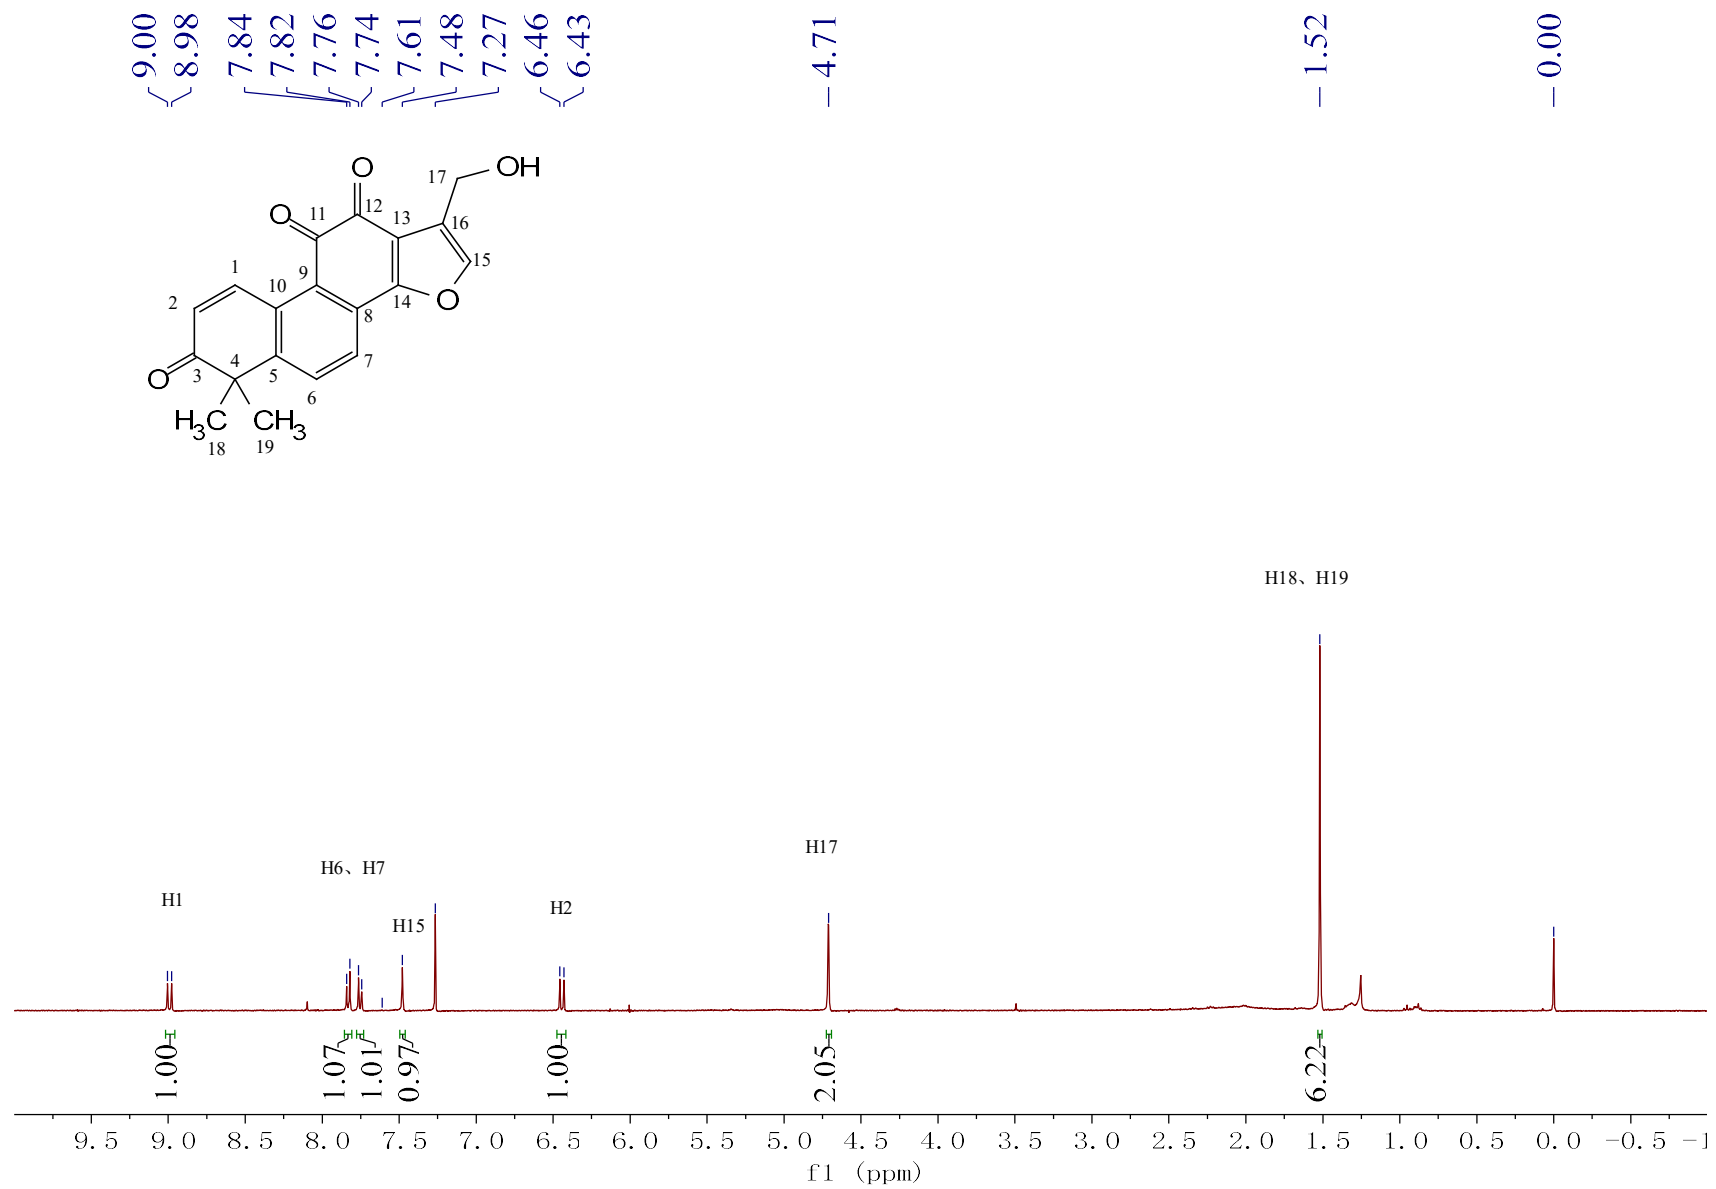

**Figure S8.** <sup>1</sup>H-NMR spectrum of compound 12

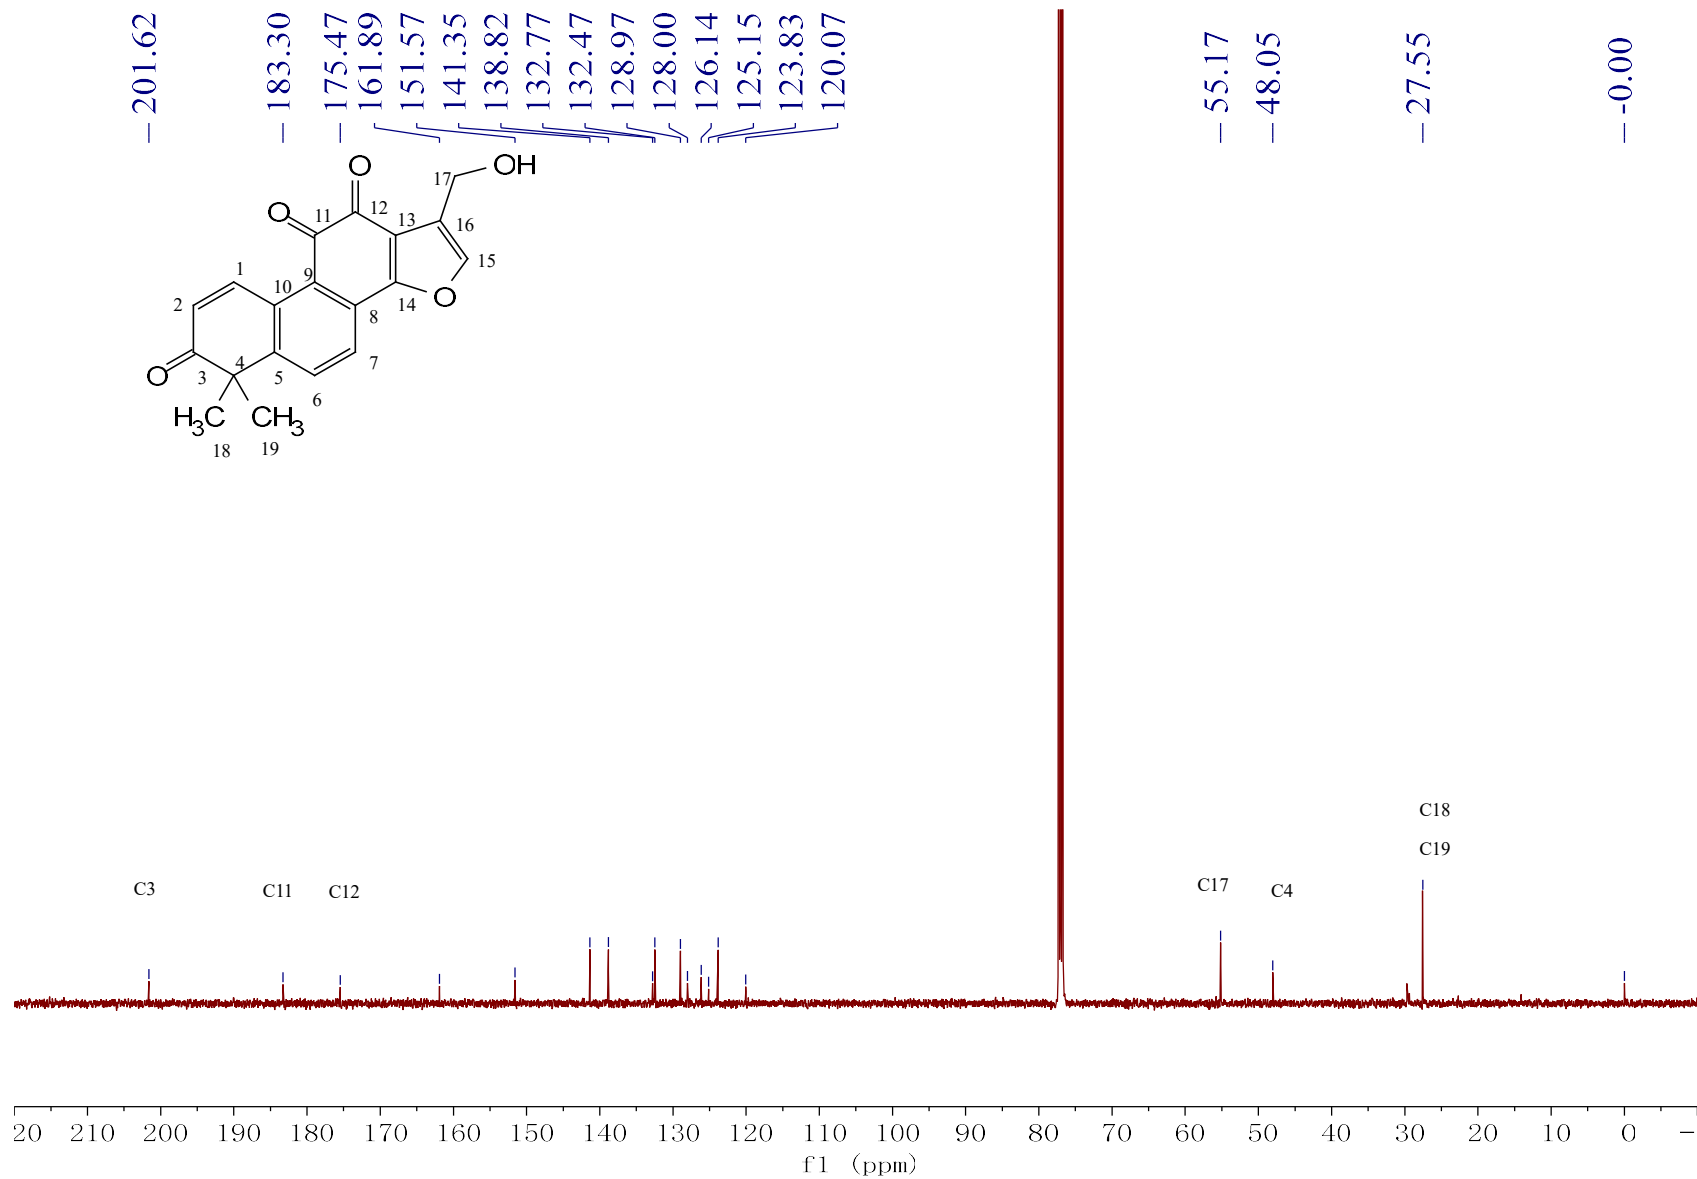

Figure S9. <sup>13</sup>C-NMR spectrum of compound 12

## Qualitative Analysis Report

|                 |                                        |                        |                             |
|-----------------|----------------------------------------|------------------------|-----------------------------|
| Data Filename   | ESIH_20181226_ZA_ZHC_05.d              | Sample Name            | D5-12598-044                |
| Sample Type     | Sample                                 | Position               | P1-A2                       |
| Instrument Name | Agilent G6520 Q-TOF                    | Acq Method             | 20160322_MS_ESIH_POS_1min.m |
| Acquired Time   | 12/26/2018 13:27:43                    | IRM Calibration Status | Success                     |
| DA Method       | small molecular data analysis method.m | Comment                | ESIH by ZZY                 |

### User Spectra

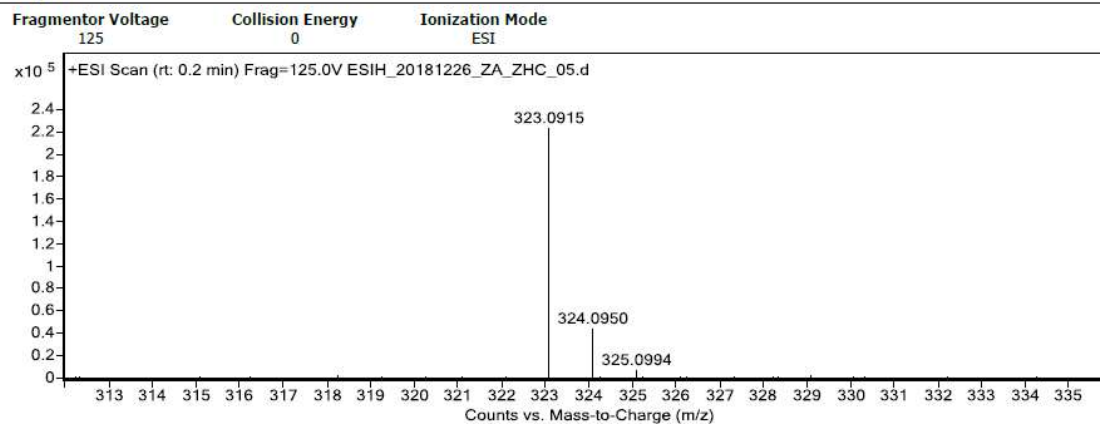

### Formula Calculator Results

| m/z      | Calc m/z | Diff (mDa) | Diff (ppm) | Ion Formula                                    | Ion                |
|----------|----------|------------|------------|------------------------------------------------|--------------------|
| 323.0915 | 323.0914 | -0.07      | -0.21      | C <sub>19</sub> H <sub>15</sub> O <sub>5</sub> | (M+H) <sup>+</sup> |

--- End Of Report ---

Figure S10. HRMS of compound 12

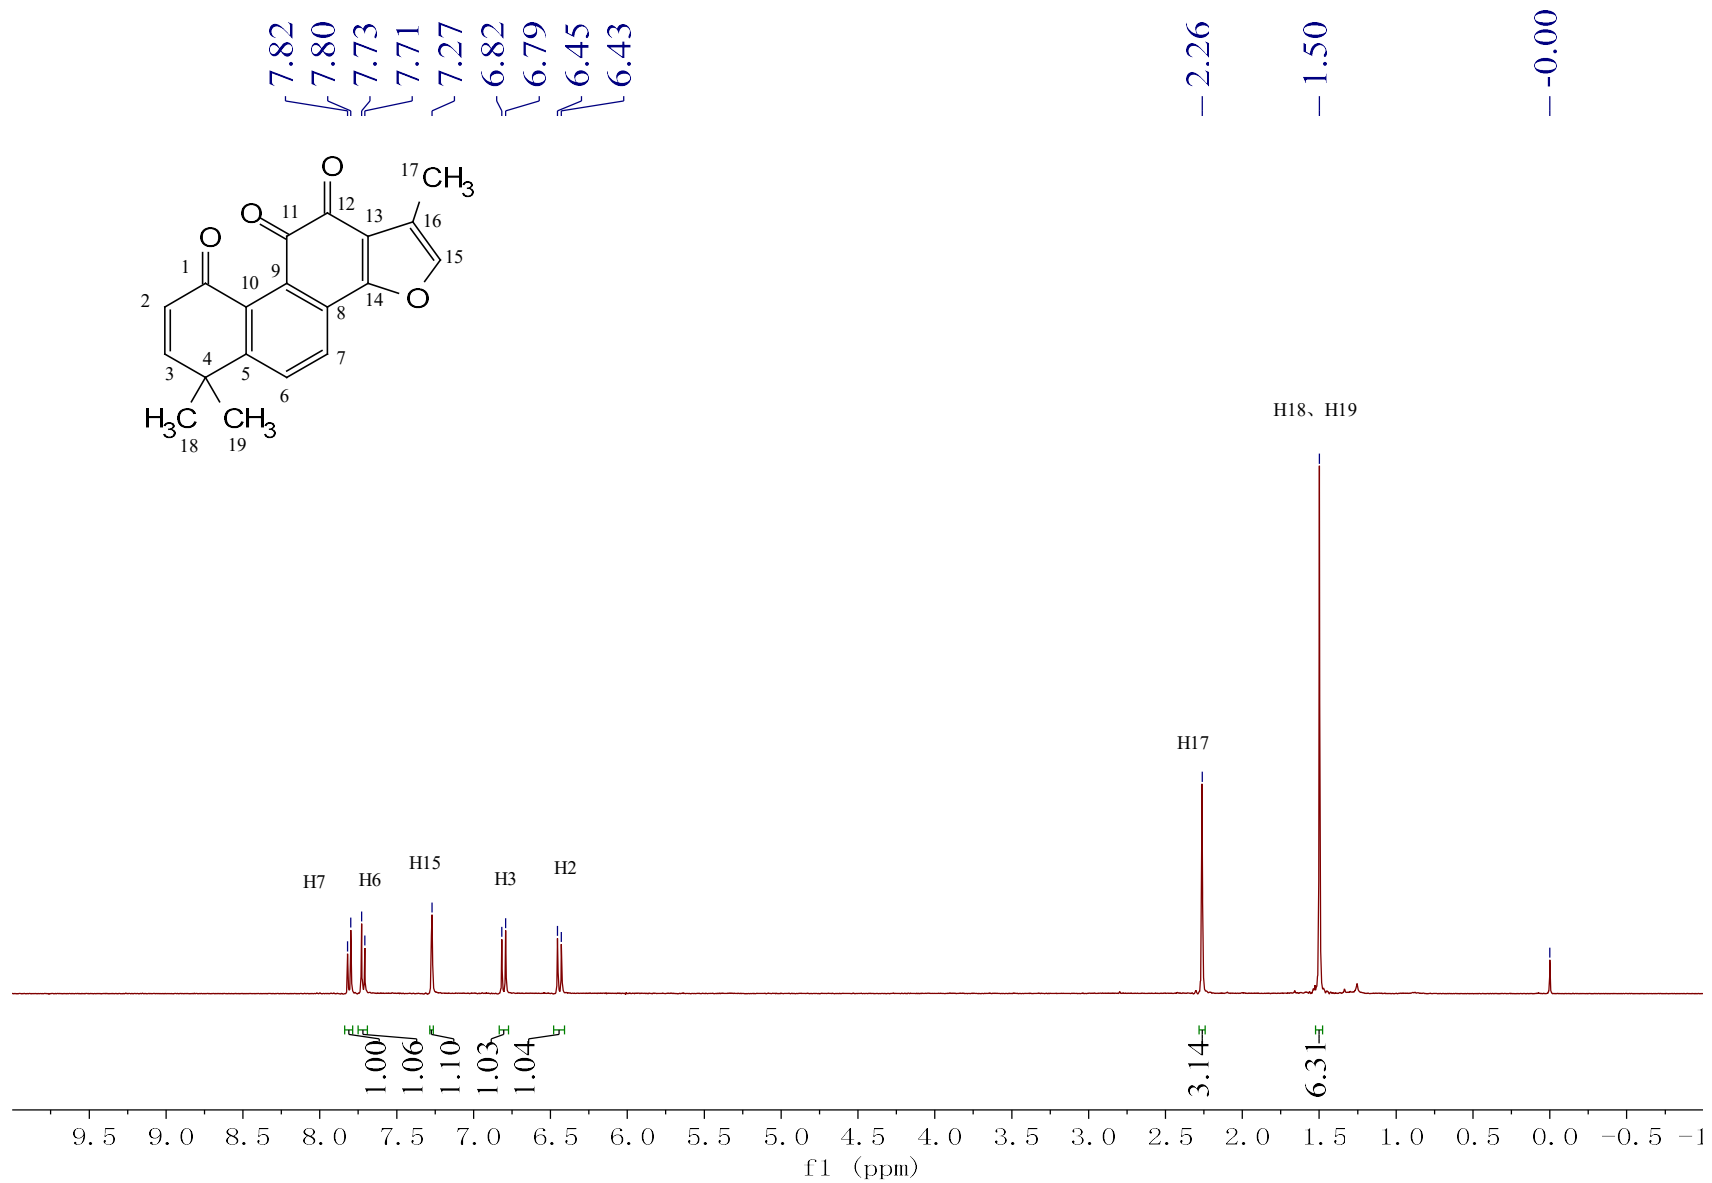

Figure S11. <sup>1</sup>H-NMR spectrum of compound 14

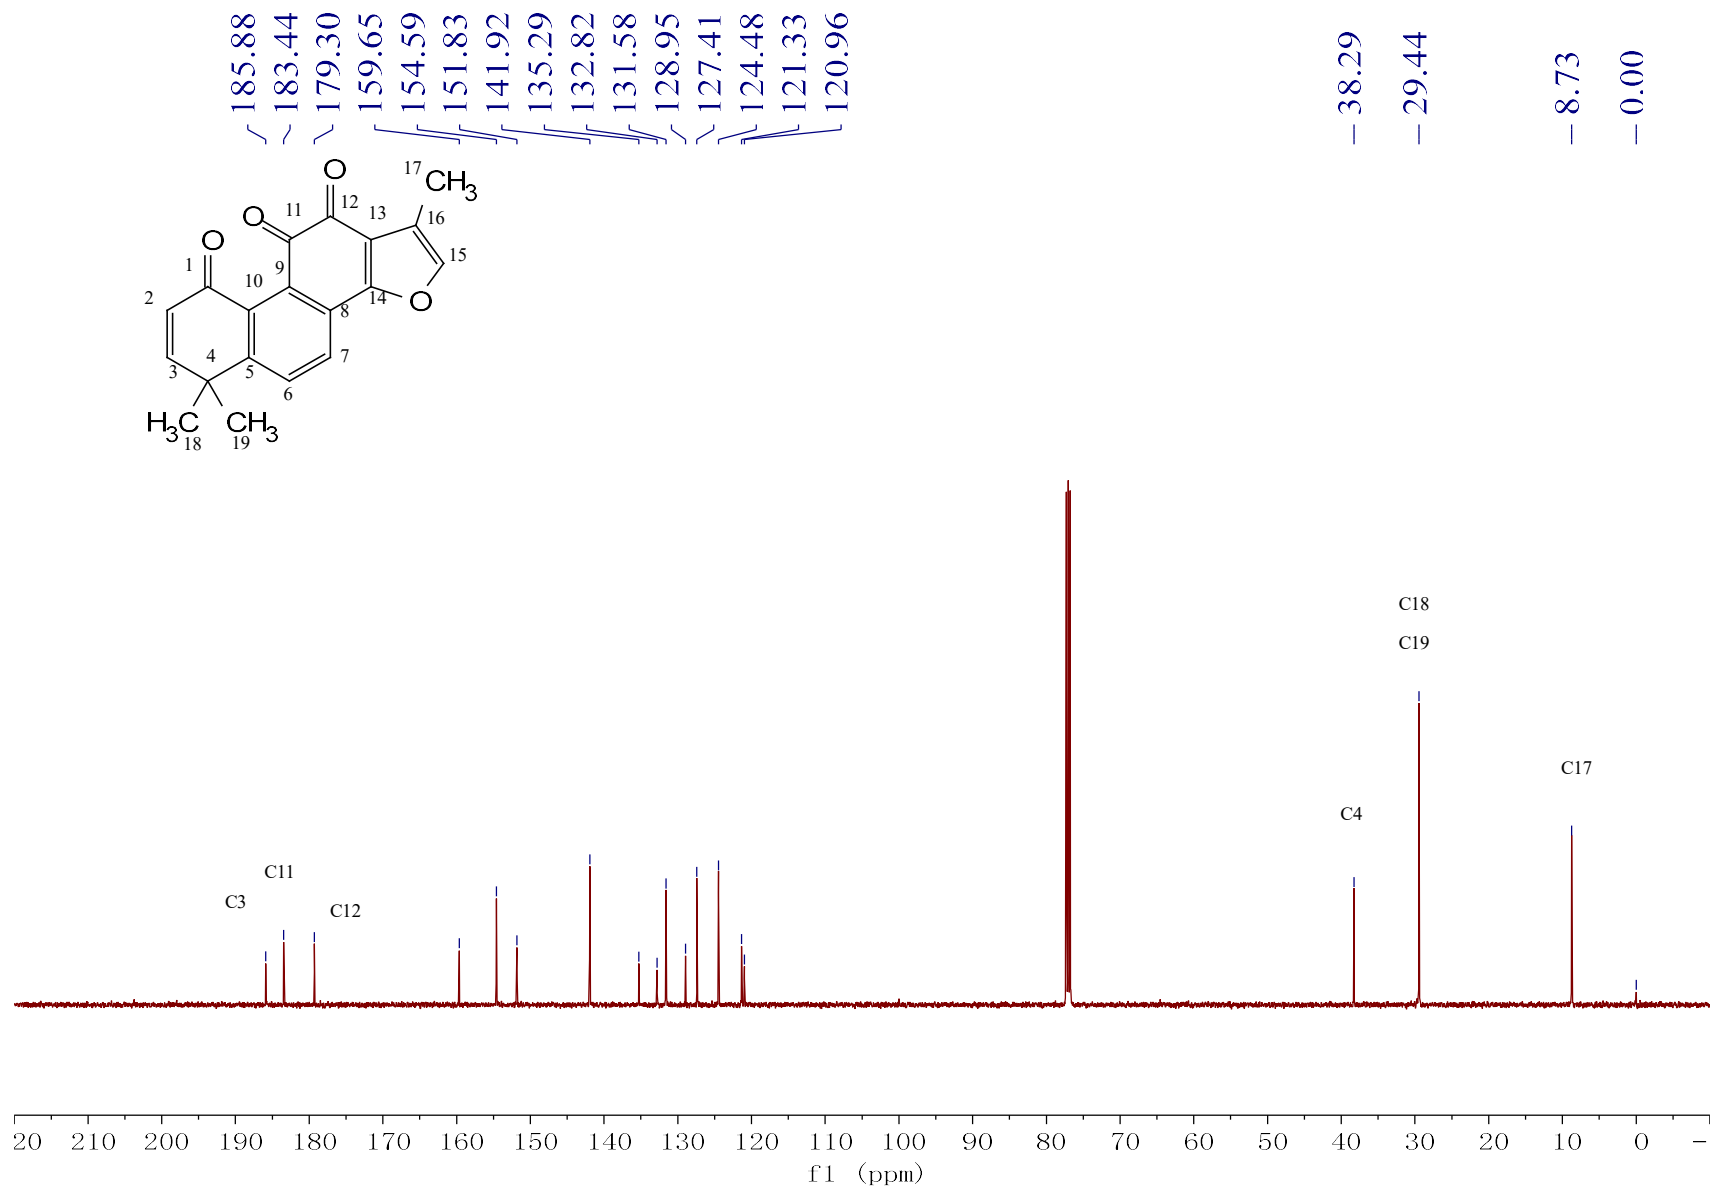

Figure S12. <sup>13</sup>C-NMR spectrum of compound 14

## Qualitative Analysis Report

|                 |                                        |                        |                             |
|-----------------|----------------------------------------|------------------------|-----------------------------|
| Data Filename   | ESIH_20181226_ZA_ZHC_02.d              | Sample Name            | D5-12598-501                |
| Sample Type     | Sample                                 | Position               | P1-A1                       |
| Instrument Name | Agilent G6520 Q-TOF                    | Acq Method             | 20160322_MS_ESIH_POS_1min.m |
| Acquired Time   | 12/26/2018 13:20:22                    | IRM Calibration Status | Success                     |
| DA Method       | small molecular data analysis method.m | Comment                | ESIH by ZZY                 |

### User Spectra

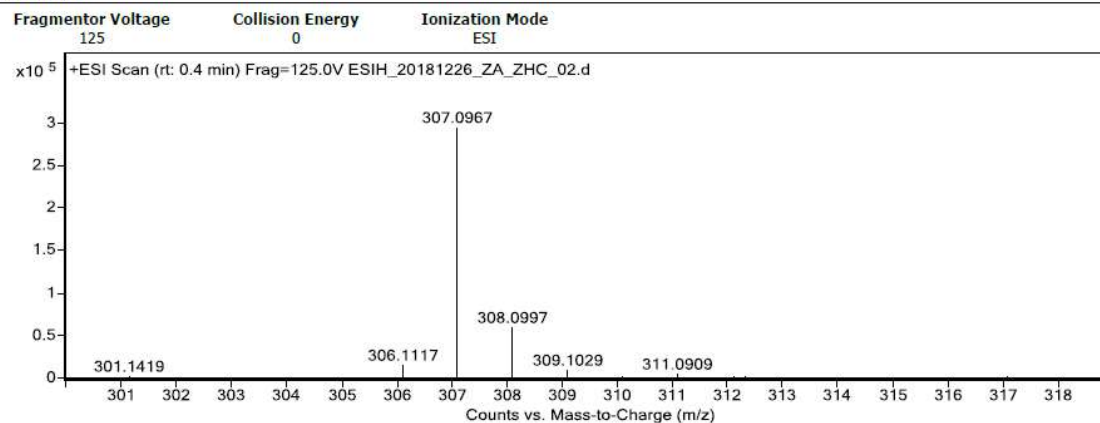

### Formula Calculator Results

| m/z      | Calc m/z | Diff (mDa) | Diff (ppm) | Ion Formula | Ion                |
|----------|----------|------------|------------|-------------|--------------------|
| 307.0967 | 307.0965 | -0.24      | -0.77      | C19 H15 O4  | (M+H) <sup>+</sup> |

--- End Of Report ---

Figure S13. HRMS of compound 14

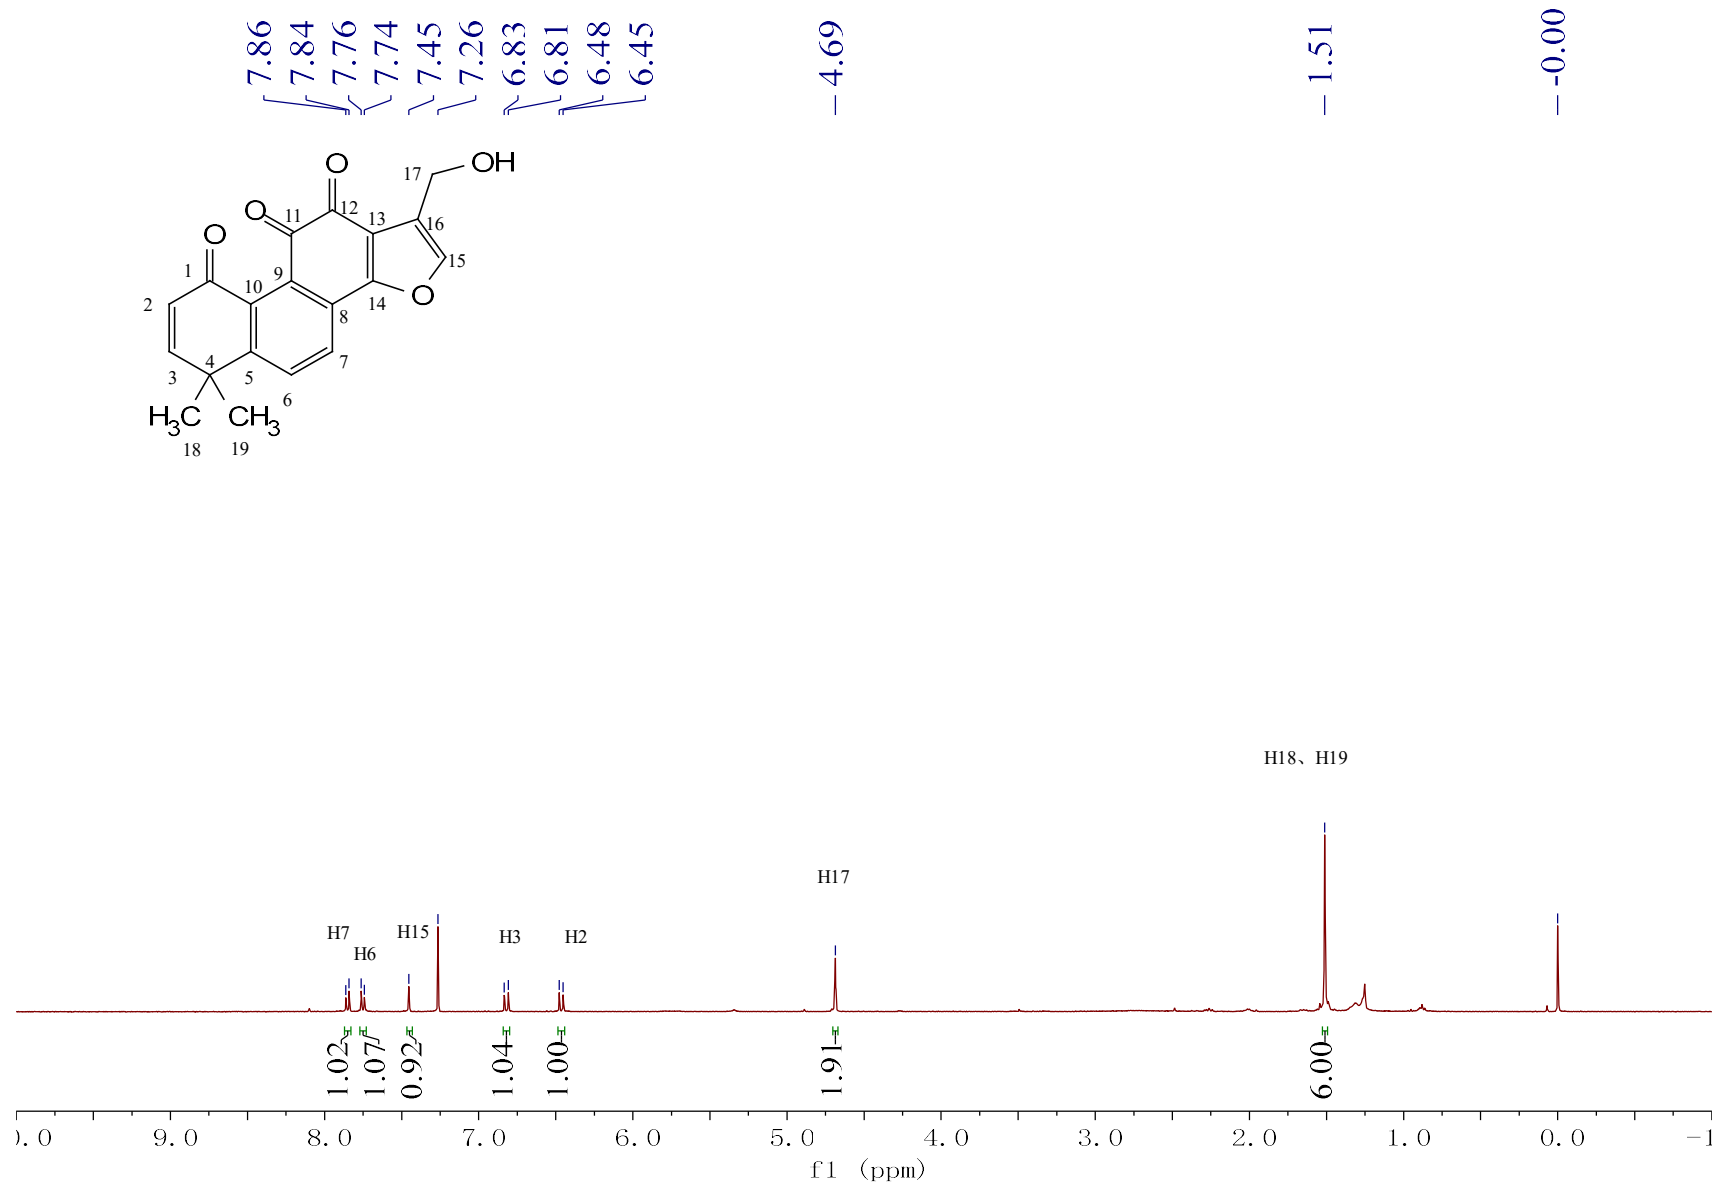

**Figure S14.** <sup>1</sup>H-NMR spectrum of compound 15

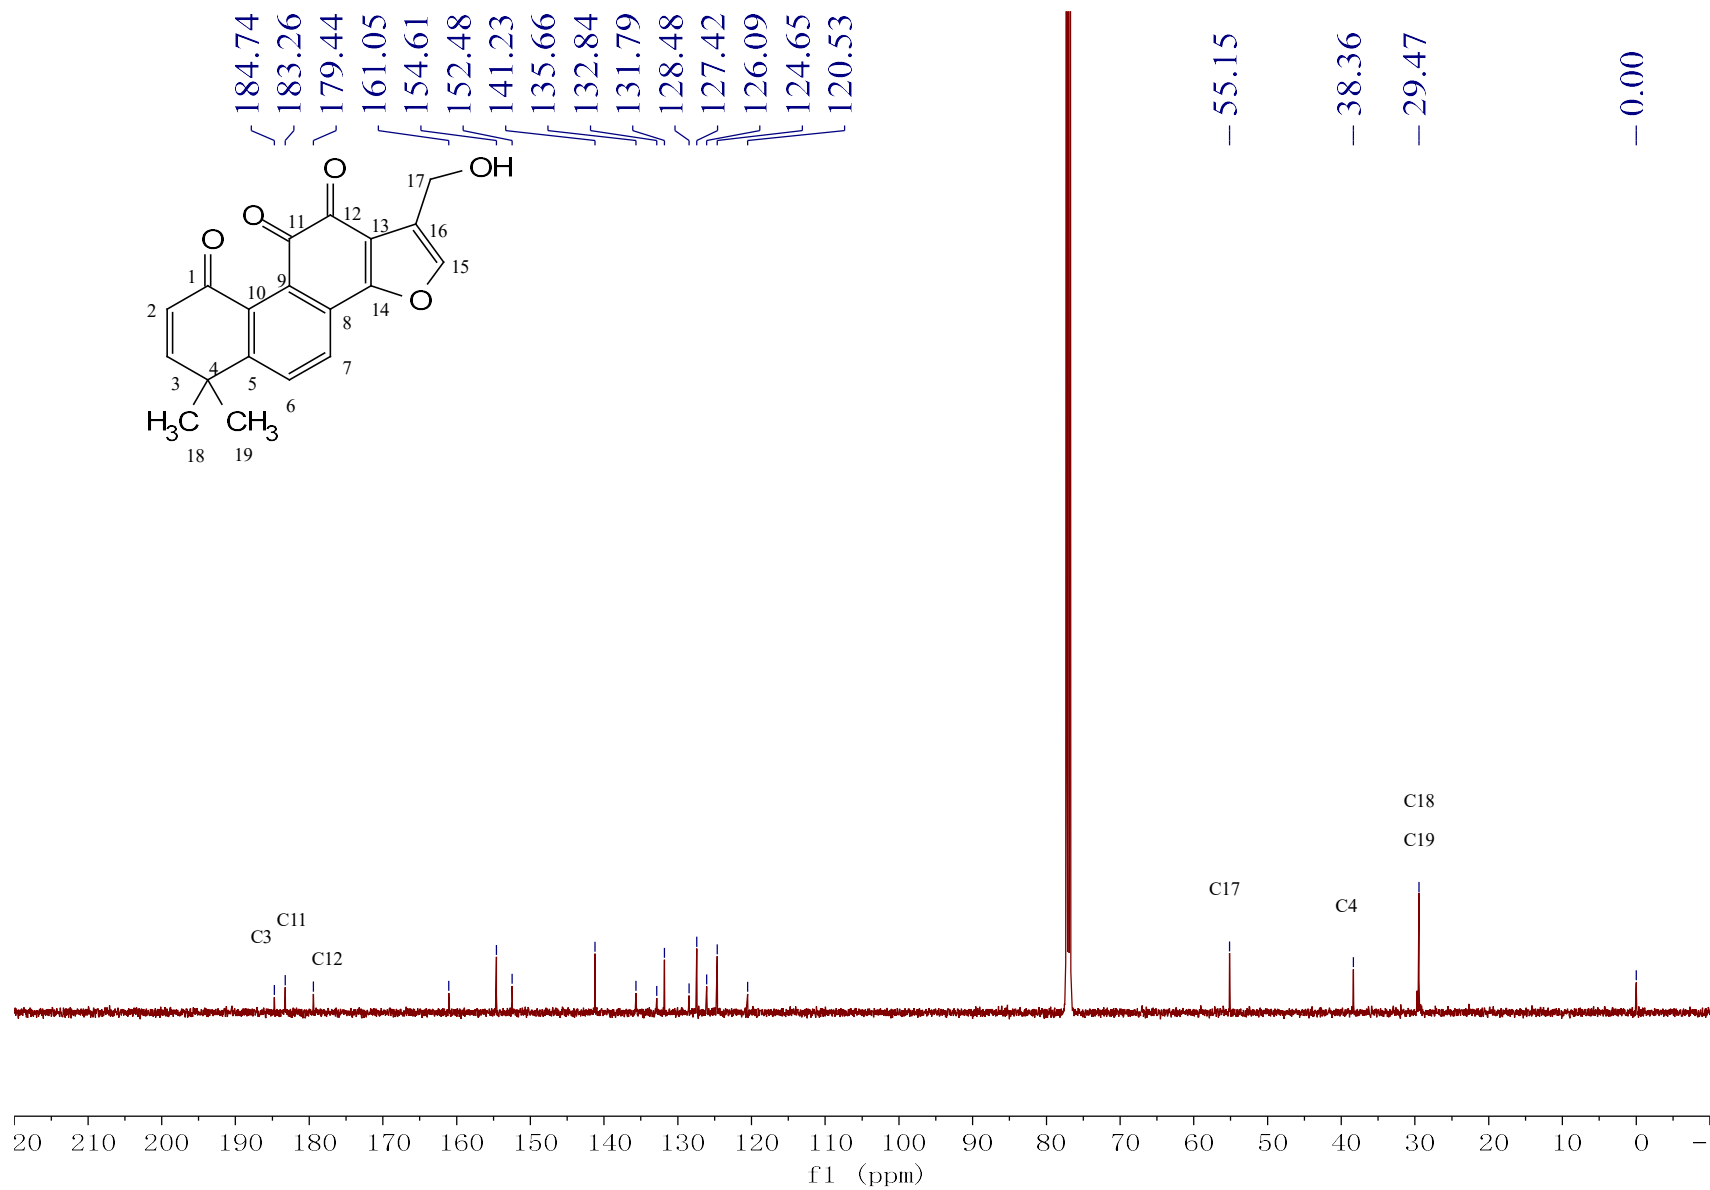

Figure S15. <sup>13</sup>C-NMR spectrum of compound 15



## Qualitative Analysis Report

|                 |                                        |                        |                             |
|-----------------|----------------------------------------|------------------------|-----------------------------|
| Data Filename   | ESIH_20181226_ZA_ZHC_03.d              | Sample Name            | D5-12598-502                |
| Sample Type     | Sample                                 | Position               | P1-A2                       |
| Instrument Name | Agilent G6520 Q-TOF                    | Acq Method             | 20160322_MS_ESIH_POS_1min.m |
| Acquired Time   | 12/26/2018 13:22:25                    | IRM Calibration Status | Success                     |
| DA Method       | small molecular data analysis method.m | Comment                | ESIH by ZZY                 |

### User Spectra

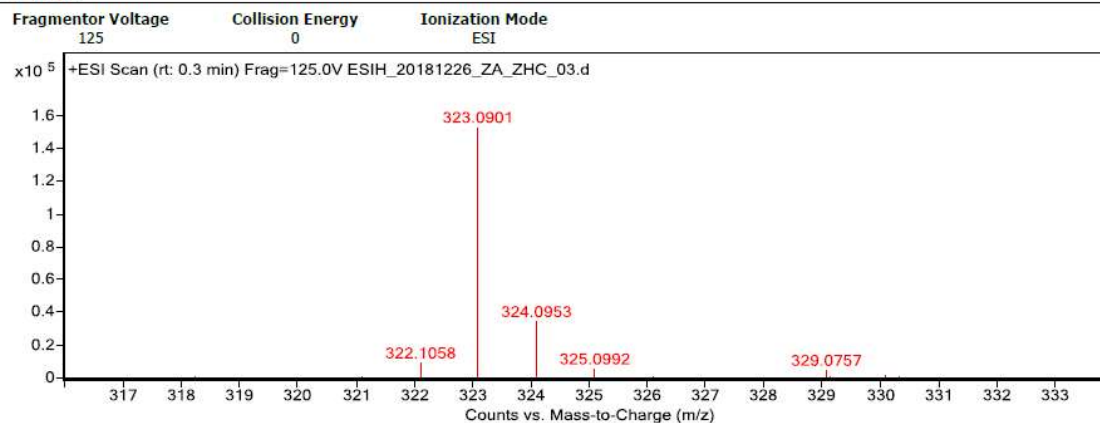

### Formula Calculator Results

| m/z      | Calc m/z | Diff (mDa) | Diff (ppm) | Ion Formula | Ion    |
|----------|----------|------------|------------|-------------|--------|
| 323.0901 | 323.0914 | 1.29       | 3.98       | C19 H15 O5  | (M+H)+ |

--- End Of Report ---

Figure S16. HRMS of compound 15

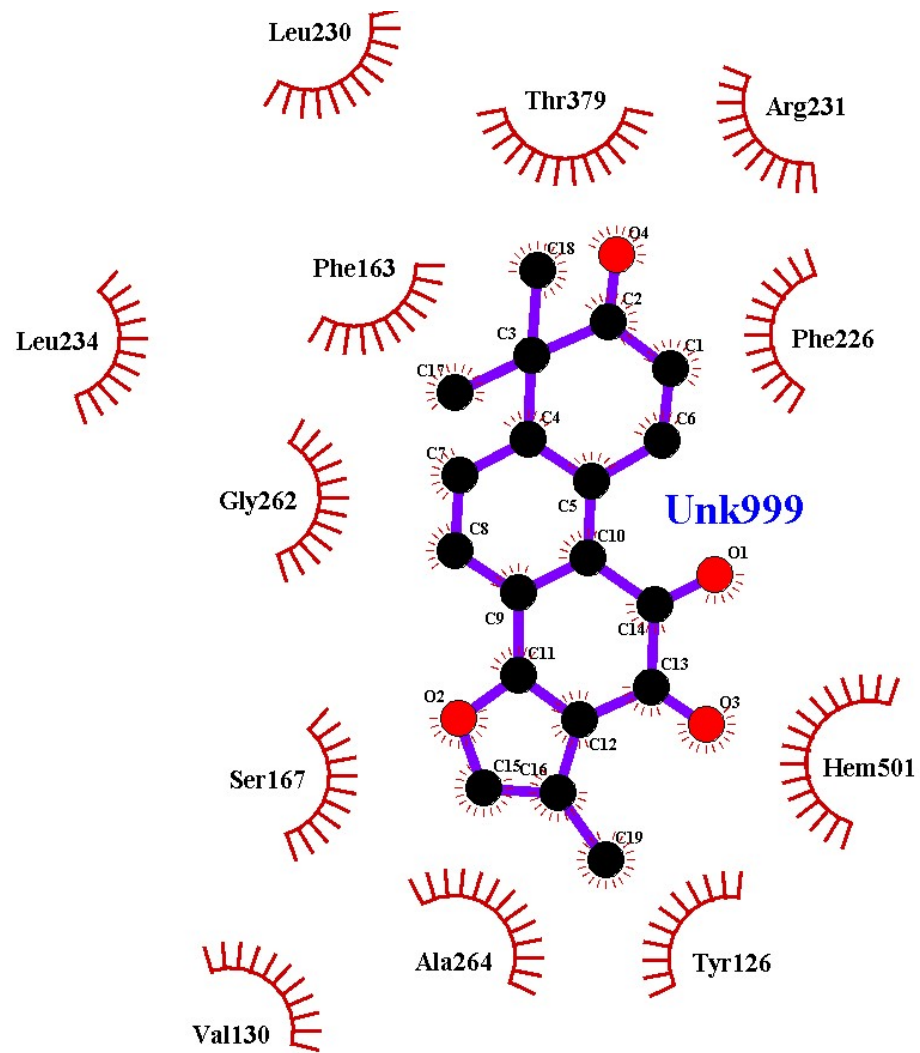

(a)

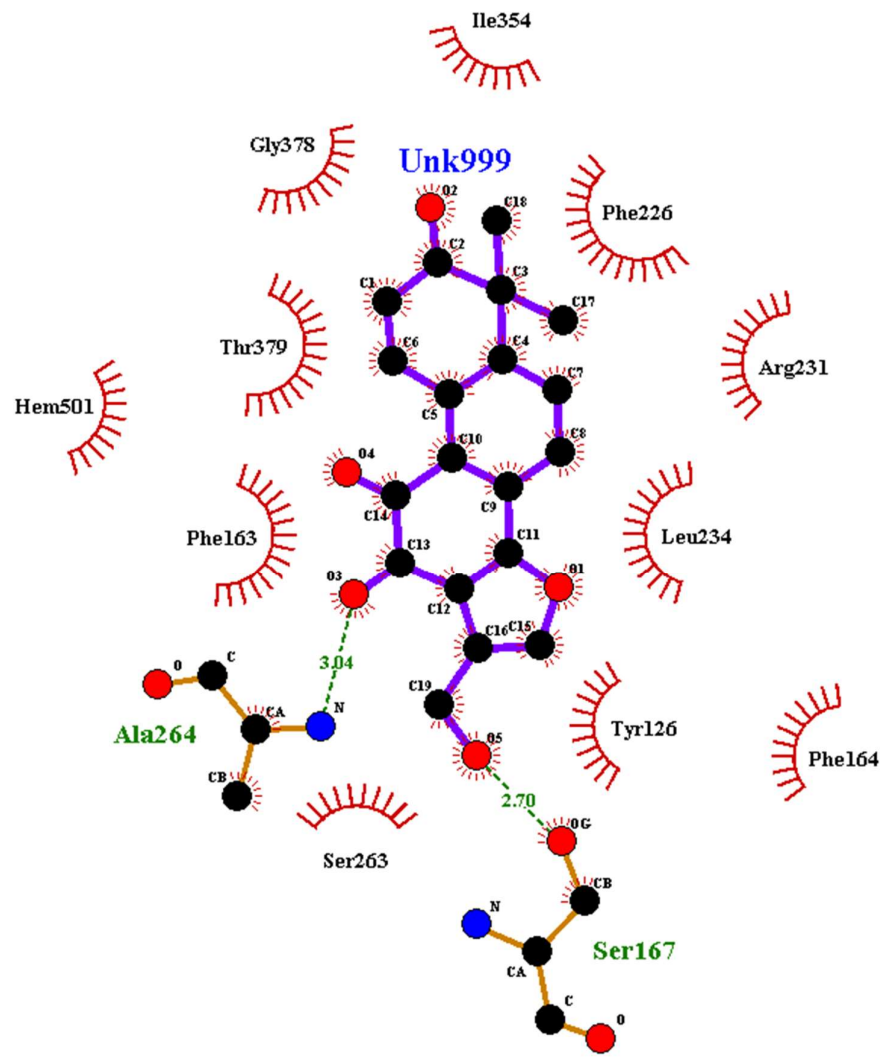

(b)

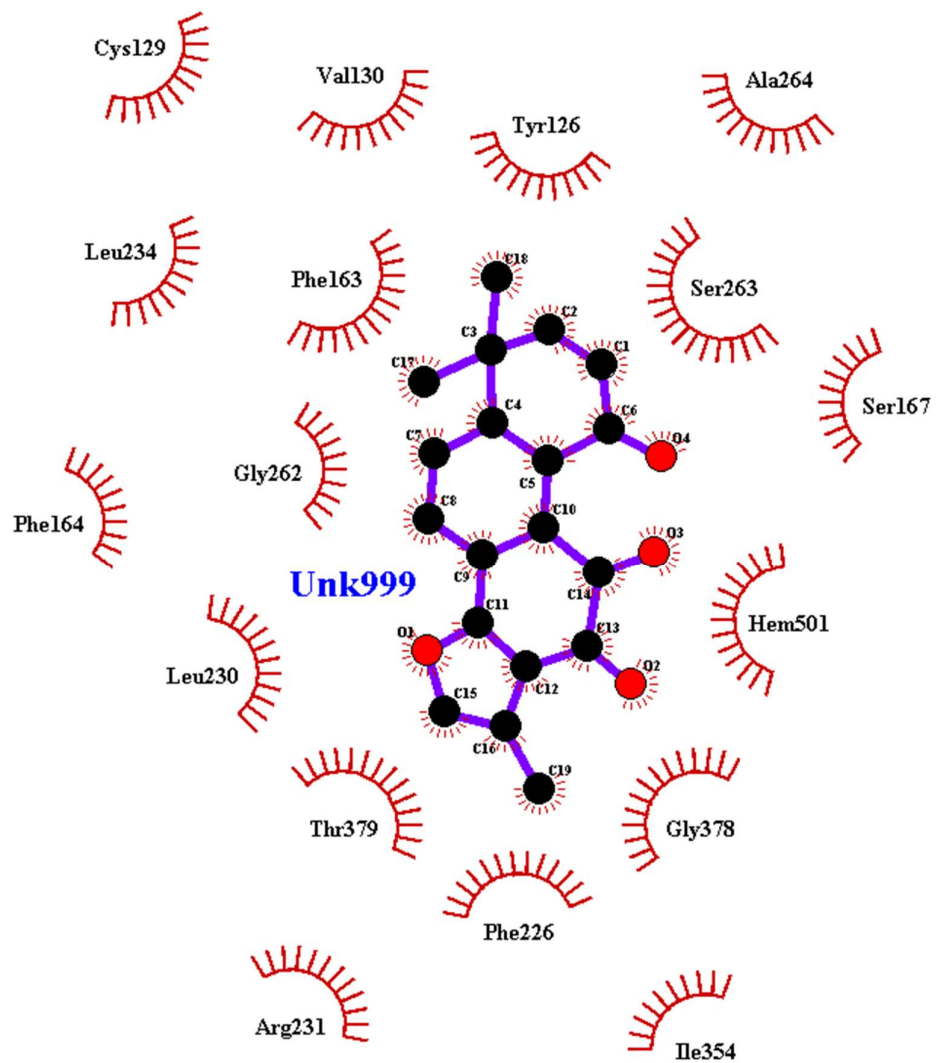

(c)

Figure S17. (a) 2D binding mode of **11** against IDO-1; (b) 2D binding mode of **12** against IDO-1; (c) 2D binding mode of **14** against IDO-1.
